# Supplementary material for: Differential proteome–metabolome profiling of YCA1 -knock-out and wild type cells reveals novel metabolic pathways and cellular processes dependent on the yeast metacaspase
Source: Royal Society of Chemistry journal article supplement (doi:10.1039/c4mb00660g), 2015-02-11
Supplement: c4mb00660g1.pdf [file c4mb00660g1.pdf]

**Table 1.** Relative proteomic changes between WT and  $\Delta yca1$  cells

| Spot number                    | Theoretical Mr (Da) | Theoretical pI | N. of peptides identified | Mascot score | Proteins identified | Function                                                          | NCBI accession number | Fold change | Expression level |
|--------------------------------|---------------------|----------------|---------------------------|--------------|---------------------|-------------------------------------------------------------------|-----------------------|-------------|------------------|
| <b>Carbohydrate metabolism</b> |                     |                |                           |              |                     |                                                                   |                       |             |                  |
| 1911                           | 39811               | 5.51           | 8                         | 174          | Fba1                | Fructose 1,6-bisphosphate aldolase                                | gi 6322790            | 2.2         | Down             |
| 882                            | 35938               | 6.46           | 24                        | 427          | Tdh2                | Glyceraldehyde-3-phosphate dehydrogenase, isozyme 2               | gi 6322468            | 2.2         | Down             |
| 753                            | 35938               | 6.46           | 7                         | 58           |                     |                                                                   | gi 6322468            | 2.3         | Down             |
| 1910                           | 27461               | 8.86           | 37                        | 600          | Gpm1                | Glycerate PhosphoMutase                                           | gi 2624630            | 2.1         | Down             |
| 114                            | 46942               | 5.67           | 36                        | 826          | Eno2                | Enolase II                                                        | gi 6321968            | 2.0         | Down             |
| 1911                           | 61685               | 5.8            | 27                        | 593          | Pdc1                | Pyruvate DeCarboxylase                                            | gi 6323073            | 2.2         | Down             |
| 972                            | 37282               | 6.21           | 55                        | 943          | Adh1                | Alcohol dehydrogenase                                             | gi 6324486            | 2.5         | Down             |
| 349                            | 37282               | 6.21           | 46                        | 827          |                     |                                                                   | gi 6324486            | 2.2         | Down             |
| 408                            | 37127               | 6.09           | 10                        | 311          | Tal1                | Transaldolase                                                     | gi 6323386            | 2.1         | Down             |
| <b>Amino acid metabolism</b>   |                     |                |                           |              |                     |                                                                   |                       |             |                  |
| 408                            | 38347               | 6.84           | 38                        | 724          | Hom6                | Homoserine dehydrogenase (L-homoserine:NADP oxidoreductase)       | gi 7245384            | 2.1         | Down             |
| 649                            | 37283               | 6.21           | 38                        | 632          | Sfa1                | Bifunctional alcohol dehydrogenase and formaldehyde dehydrogenase | gi 480311017          | 2.0         | Down             |
| <b>Nucleic acid metabolism</b> |                     |                |                           |              |                     |                                                                   |                       |             |                  |
| 474                            | 35387               | 8.51           | 5                         | 133          | Prs3                | PhosphoRibosylpyrophosphate Synthetase                            | gi 6321776            | 3.3         | Down             |
| <b>Translation machinery</b>   |                     |                |                           |              |                     |                                                                   |                       |             |                  |
| 1031                           | 41542               | 8.36           | 27                        | 359          | Tef1/2              | Translation elongation factor                                     | gi 32563240           | 4.6         | Down             |
| 1029                           | 41545               | 8.36           | 33                        | 505          |                     |                                                                   | gi 32693297           | 2.5         | Down             |
| 1939                           | 41542               | 8.36           | 19                        | 415          |                     |                                                                   | gi 32563240           | 4.0         | Down             |

|                                      |       |       |    |     |        |                                                                      |              |     |      |
|--------------------------------------|-------|-------|----|-----|--------|----------------------------------------------------------------------|--------------|-----|------|
| 1926                                 | 50400 | 9.14  | 7  | 149 |        |                                                                      | gi 6319594   | 2.8 | Down |
| 1949                                 | 50400 | 9.14  | 11 | 199 |        |                                                                      | gi 6319594   | 3.0 | Down |
| 1308                                 | 13685 | 5.91  | 3  | 99  | Rpl22a | Ribosomal 60S subunit protein L22A                                   | gi 6323090   | 2.1 | Down |
| 1659                                 | 28852 | 10.02 | 7  | 247 | Rps1b  | Ribosomal protein 10 (rp10) of the small (40S) subunit               | gi 6323577   | 2.6 | Down |
| 1031                                 | 26543 | 9.42  | 22 | 555 | Rps3   | Ribosomal protein of the small subunit                               | gi 398364505 | 4.6 | Down |
| 649                                  | 26518 | 9.44  | 4  | 106 |        |                                                                      | gi 468426    | 2.0 | Down |
| 1949                                 | 26543 | 9.42  | 24 | 575 |        |                                                                      | gi 398364505 | 3.0 | Down |
| 1910                                 | 29449 | 10.09 | 36 | 675 | Rps4b  | Protein component of the small (40S) ribosomal subunit               | gi 6321997   | 2.1 | Down |
| 1659                                 | 29449 | 10.09 | 16 | 653 |        |                                                                      | gi 6321997   | 2.6 | Down |
| 882                                  | 15992 | 10.7  | 2  | 64  | Rps15  | Ribosomal protein of the small subunit                               | gi 6324533   | 2.2 | Down |
| 882                                  | 15838 | 10.26 | 4  | 92  | Rps16b | Ribosomal protein of the small subunit                               | gi 6320120   | 2.2 | Down |
| 1354                                 | 18786 | 4.41  | 5  | 102 | Tma19  | Translation machinery-associated protein 19                          | gi 6322794   | 2.6 | Up   |
| <b>Protein transport and folding</b> |       |       |    |     |        |                                                                      |              |     |      |
| 1807                                 | 17010 | 6.1   | 12 | 253 | Egd1   | Enhancer of Gal4 DNA binding                                         | gi 6325220   | 2.0 | Down |
| 1939                                 | 56630 | 9.42  | 2  | 51  | Nup57  | FG-nucleoporin component of central core of the nuclear pore complex | gi 1945327   | 4.0 | Down |
| <b>Stress response</b>               |       |       |    |     |        |                                                                      |              |     |      |
| 769                                  | 19274 | 5.01  | 6  | 336 | Ahp1   | Alkyl HydroPeroxide reductase                                        | gi 6323138   | 2.8 | Up   |
| 773                                  | 19274 | 5.01  | 6  | 336 |        |                                                                      | gi 6323138   | 2.1 | Up   |
| <b>Cell wall biosynthesis</b>        |       |       |    |     |        |                                                                      |              |     |      |
| 570                                  | 29216 | 5.14  | 6  | 129 | Sec53  | Phosphomannomutase                                                   | gi 14318474  | 2.0 | Up   |
| 408                                  | 39684 | 5.95  | 3  | 63  | Psa1   | GDP-mannose pyrophosphorylase                                        | gi 894204    | 2.1 | Down |
| <b>Vacuolar acidification</b>        |       |       |    |     |        |                                                                      |              |     |      |

---

|     |       |      |    |     |                |                                  |              |     |      |
|-----|-------|------|----|-----|----------------|----------------------------------|--------------|-----|------|
| 570 | 26568 | 5.48 | 6  | 136 | Vma4           | Vacuolar H <sup>+</sup> -Atp-ase | gi 173169    | 2.0 | Up   |
|     |       |      |    |     | <b>Unknown</b> |                                  |              |     |      |
| 557 | 27541 | 5.10 | 15 | 210 | Hri1           | HRr25 Interacting                | gi 6323332   | 2.1 | Up   |
|     |       |      |    |     | <b>Other</b>   |                                  |              |     |      |
| 882 | 15956 | 9.07 | 3  | 124 | Mmf1           | Mitochondrial Matrix Factor      | gi 151943108 | 2.2 | Down |

---
